# Supplementary material for: Synthesis of efficient Co and N co-doped carbon catalysts with high surface areas for selective oxidation of ethylbenzene
Source: Royal Society of Chemistry journal article supplement (doi:10.1039/c8nj01402g), 2018-01-01
Supplement: c8nj01402g1.pdf [file c8nj01402g1.pdf]

## Supporting Information

### Synthesis of efficient Co and N-co-doped carbon catalysts with high surface areas for selective oxidation of ethylbenzene

Yuan Li, Shanshan Jie,<sup>†</sup> Kun Li, Zhigang Liu\*

State Key Laboratory of Chemo/Biosensing and Chemometrics, College of Chemistry and Chemical Engineering, Hunan University, Changsha, Hunan 410082, China

\*E-mail: [liuzhigang@hnu.edu.cn](mailto:liuzhigang@hnu.edu.cn)

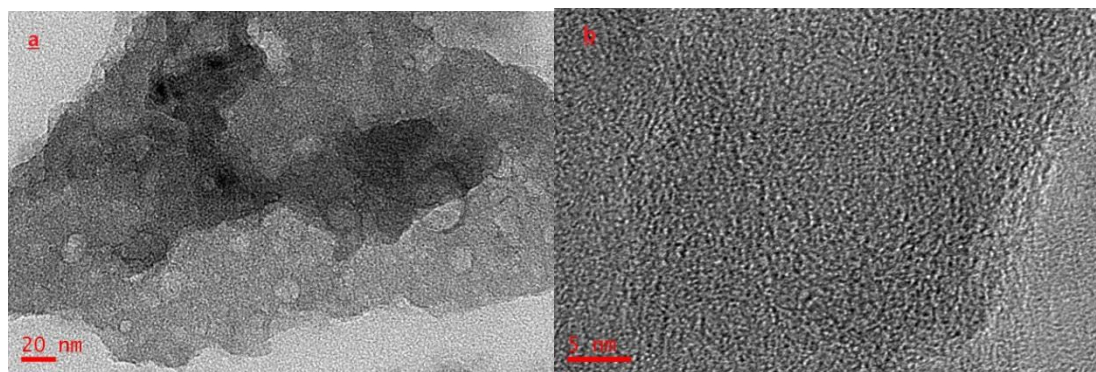

**Fig. S1** TEM image of p-Co-N-C-700H-r4 (a), and HRTEM images of p-Co-N-C-700H-r4 (b)

The TEM and HRTEM images of p-Co-N-C-700H-r4 revealed the structure of the catalyst without obvious change after the reaction. Moreover, a great deal of mesoporous structure was still remained. However, compared with p-Co-N-C-700H, the size of metal nanoparticles was smaller.

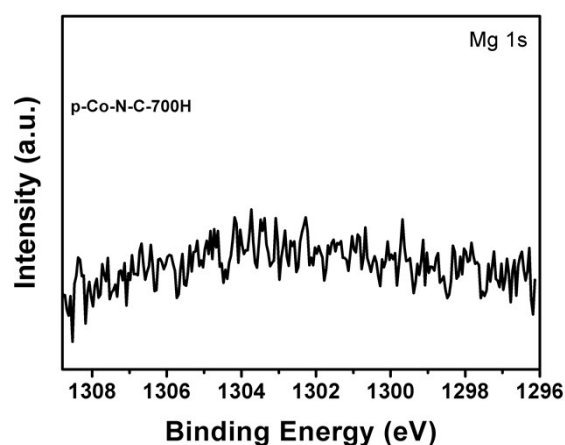

**Fig. S2** The high-resolution Mg 1s XPS spectrum of p-Co-N-C-700H.

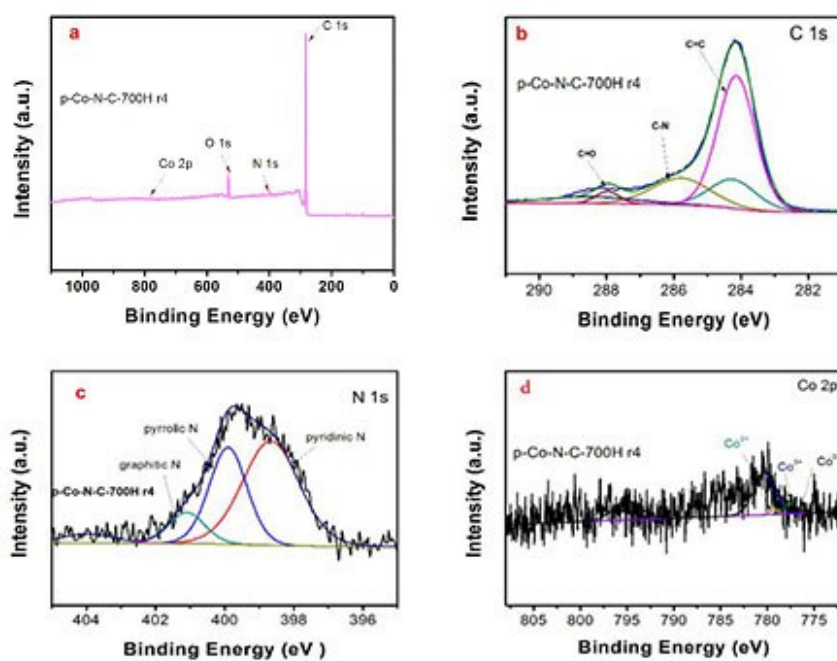

**Fig. S3** XPS patterns of p-Co-N-C-700H-r4; a) high-resolution C1s XPS spectrum, b) high-resolution O1s XPS spectrum; c) high-resolution N1s XPS spectrum; d) high-resolution Co2p XPS spectrum

**Table S1** The ratio analysis of the peaks in XPS spectra of the p-Co-N-C-700H-r4.

| Element content                        | p-Co-N-C-700H-r4 |
|----------------------------------------|------------------|
| C (at%)                                | 80.59            |
| O (at%)                                | 14.78            |
| Co (at%)                               | 0.28             |
| Co <sup>3+</sup> /Co <sup>2+</sup> (%) | 0.31             |
| N (at%) total                          | 4.34             |
| Pyridinic N (%)                        | 60.33            |
| Pyrrolic N (%)                         | 26.29            |
| Graphitic N (%)                        | 13.38            |

**Table S2** The ratio analysis of N, Co, and Mg based on elemental analyses and ICP-AES.

| Element content | p-Co-N-C-700 | p-Co-N-C-700H |
|-----------------|--------------|---------------|
| N (wt%)         | 0.8          | 5.7           |
| Co (wt%)        | 6.2          | 1.0           |
| Mg (wt%)        | 21.8         | 0.2           |
